# Supplementary material
Source: PubMed Central journal article supplement (PMC1895482)
Supplement: blood_blood-2006-02-002824_1.pdf [file blood_blood-2006-02-002824_1.pdf]

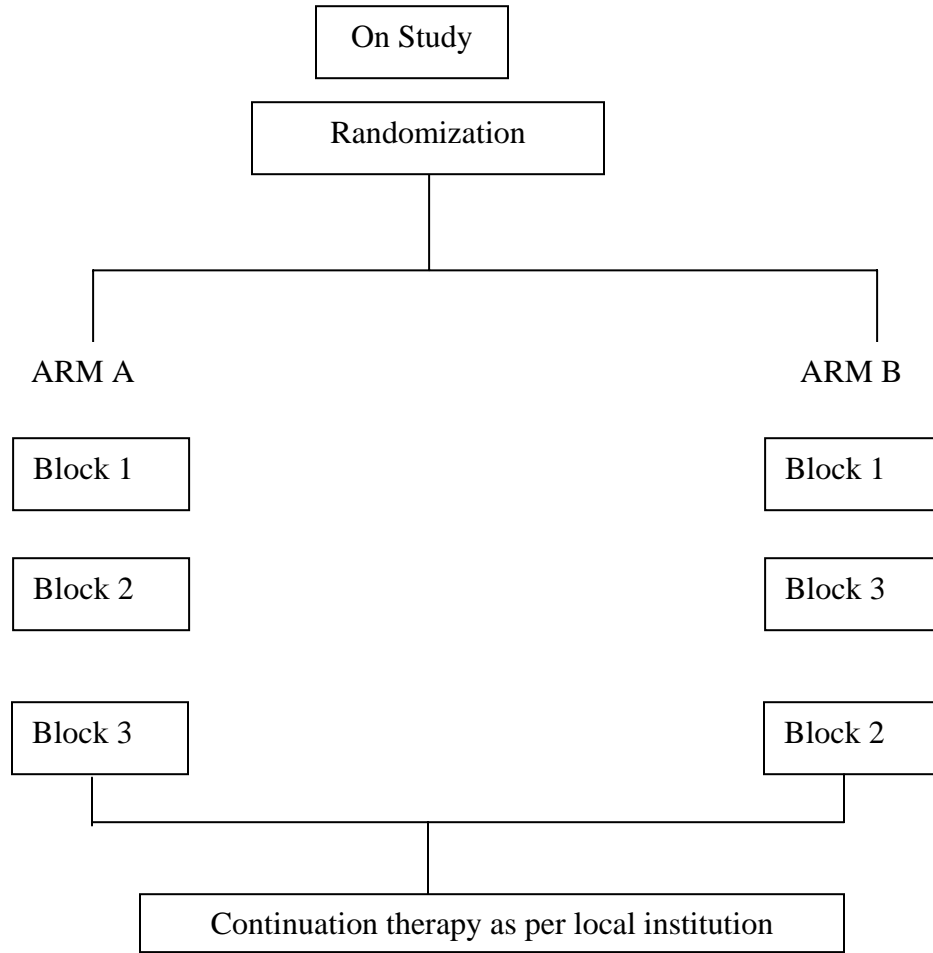

Block 1

Vincristine  
 Prednisolone  
 PEG-asparaginase  
 Doxorubicin  
 IT Cytarabine  
 IT Methotrexate  
 Imatinib (Ph+ ALL)

Block 2

Etoposide  
 Cyclophosphamide  
 Methotrexate  
 IT Methotrexate  
 Imatinib (Ph+ ALL)

Block 3

Cytarabine  
 L-asparaginase  
 Imatinib (Ph+ ALL)
