# Supplementary material
Source: PubMed Central journal article supplement (PMC1895482)
Supplement: blood_blood-2006-02-002824_2.pdf [file blood_blood-2006-02-002824_2.pdf]

A: 35 pairs at diagnosis and relapse

| Pair number | Diagnosis sample | Relapse sample | Timing of Relapse | Duration of CR1 (months) | Treatment protocol at diagnosis | Immuno-phenotype | Correlation Co-efficient |
|-------------|------------------|----------------|-------------------|--------------------------|---------------------------------|------------------|--------------------------|
| Pair 1      | #D1              | #R3            | Early             | 18.9                     | CCG 1991                        | B-Precursor      | 0.469                    |
| Pair 2~     | #D2              | #R4            | Early             | 17.63                    | CCG 1961                        | B-Precursor      | 0.39                     |
| Pair 3      | #D3              | #R20           | Early             | 18                       | CCG 1961                        | B-Precursor      | 0.147                    |
| Pair 4      | #D4              | #R39           | Early             | 13.47                    | CCG 1961                        | T-cell           | 0.555                    |
| Pair 5      | #D5              | #R37           | Late              | 54.1                     | CCG 1952                        | B-Precursor      | 0.061                    |
| Pair 6      | #D6              | #R36           | Late              | 49.33                    | Unknown                         | B-Precursor      | 0.005                    |
| Pair 7~     | #D7              | #R35           | Late              | 51                       | CCG 1952                        | B-Precursor      | 0.331                    |
| Pair 8      | #D8              | #R38           | Early             | 34.87                    | POG 9906                        | B-Precursor      | 0.392                    |
| Pair 9*^    | #D9              | #R12           | Late              | 36.73                    | POG 9407                        | B-Precursor      | 0.375                    |
| Pair 10     | #D11             | #R59           | Early             | 18.93                    | CCG 1961                        | B-Precursor      | 0.222                    |
| Pair 11     | #D12             | #R58           | Late              | 43.63                    | CCG 1961                        | T-cell           | 0.658                    |
| Pair 12~    | #D13             | #R2            | Late              | 48.17                    | POG 9201                        | B-Precursor      | 0.021                    |
| Pair 13     | #D14             | #R21           | Early             | 15.63                    | POG 9906                        | B-Precursor      | 0.176                    |
| Pair 14     | #D15             | #R46           | Early             | 30.87                    | POG 9906                        | B-Precursor      | 0.194                    |
| Pair 15     | #D16             | #R44           | Late              | 46.7                     | CCG 1922                        | B-Precursor      | -0.123                   |
| Pair 16*    | #D17             | #R60           | Late              | 45.73                    | POG 9407                        | B-Precursor      | 0.5                      |
| Pair 17~    | #D18             | #R61           | Early             | 7.57                     | POG 9905                        | B-Precursor      | 0.582                    |
| Pair 18     | #D19             | #R62           | Early             | 19.86                    | POG 9905                        | B-Precursor      | 0.642                    |
| Pair 19     | #D20             | #R63           | Early             | 14.36                    | POG 9905                        | B-Precursor      | 0.163                    |
| Pair 20     | #D21             | #R64           | Early             | 15.37                    | POG 9906                        | B-Precursor      | 0.737                    |
| Pair 21     | #D22             | #R65           | Early             | 23.11                    | Unknown                         | B-Precursor      | 0.5                      |
| Pair 22     | #D23             | #R66           | Early             | 10.45                    | POG 9905                        | B-Precursor      | 0.795                    |
| Pair 23     | #D24             | #R67           | Early             | 21.34                    | POG 9906                        | B-Precursor      | 0.477                    |
| Pair 24     | #D26             | #R69           | Early             | 21.2                     | POG 9806                        | B-Precursor      | 0.074                    |
| Pair 25     | #D27             | #R70           | Early             | 20.06                    | POG 9806                        | B-Precursor      | 0.178                    |
| Pair 26     | #D29             | #R72           | Early             | 18.78                    | POG 9906                        | B-Precursor      | 0.295                    |
| Pair 27     | #D30             | #R73           | Early             | 14.49                    | POG 9905                        | B-Precursor      | 0.503                    |
| Pair 28     | #D31             | #R74           | Late              | 38.36                    | POG 9906                        | B-Precursor      | 0.163                    |
| Pair 29~    | #D32             | #R75           | Late              | 41.34                    | POG 9905                        | B-Precursor      | 0.034                    |
| Pair 30     | #D33             | #R76           | Late              | 36.49                    | POG 9906                        | B-Precursor      | 0.453                    |
| Pair 31     | #D34             | #R77           | Late              | 40                       | POG 9906                        | B-Precursor      | 0.313                    |
| Pair 32     | #D35             | #R78           | Early             | 29.7                     | POG 9905                        | B-Precursor      | 0.545                    |
| Pair 33     | #D36             | #R79           | Early             | 16.88                    | POG 9906                        | B-Precursor      | 0.363                    |
| Pair 34     | #D37             | #R80           | Early             | 13.08                    | POG 9906                        | B-Precursor      | 0.689                    |
| Pair 35     | #D38             | #R81           | Early             | 16.03                    | AALL00P2                        | T-cell           | 0.82                     |

\* Infant (at diagnosis)

^ Ph positive

~ TEL/AML1

B: 60 patients at relapse

|    | Patient ID | Timing of Relapse | Duration of CR1 (months) | MRD at Day 36 | Marrow status at Day 36 | Immuno-phenotype |
|----|------------|-------------------|--------------------------|---------------|-------------------------|------------------|
| 1  | #R45       | Early             | 7.27                     | NA            | M3                      | B-Precursor      |
| 2  | #R61       | Early             | 7.57                     | 0.49%         | M1                      | B-Precursor      |
| 3  | #R33       | Early             | 8.5                      | 2.10%         | M2                      | B-Precursor      |
| 4  | #R7        | Early             | 13.63                    | 1.10%         | M1                      | B-Precursor      |
| 5  | #R10       | Early             | 14.77                    | 40%           | M3                      | B-Precursor      |
| 6  | #R21       | Early             | 15.63                    | 36%           | M3                      | B-Precursor      |
| 7  | #R29*      | Early             | 17.47                    | 2.70%         | M1                      | B-Precursor      |
| 8  | #R31       | Early             | 17.53                    | Negative      | M1                      | B-Precursor      |
| 9  | #R4        | Early             | 17.63                    | Negative      | M1                      | B-Precursor      |
| 10 | #R20       | Early             | 18                       | 0.55%         | M1                      | B-Precursor      |
| 11 | #R14       | Early             | 18.33                    | 0.02%         | M1                      | B-Precursor      |
| 12 | #R53*      | Early             | 18.57                    | NA            | M1                      | B-Precursor      |
| 13 | #R3        | Early             | 18.9                     | <.01%         | M1                      | B-Precursor      |
| 14 | #R59       | Early             | 18.93                    | NA            | M1                      | B-Precursor      |
| 15 | #R30       | Early             | 19.97                    | 0.01%         | M3                      | B-Precursor      |
| 16 | #R52       | Early             | 22.3                     | <.01%         | M1                      | B-Precursor      |
| 17 | #R8        | Early             | 22.97                    | <.01%         | M1                      | B-Precursor      |
| 18 | #R13       | Early             | 23.13                    | Negative      | M1                      | B-Precursor      |
| 19 | #R28       | Early             | 24.77                    | 3%            | M1                      | B-Precursor      |
| 20 | #R41       | Early             | 27.1                     | 1.60%         | M1                      | B-Precursor      |
| 21 | #R6        | Early             | 27.6                     | 0.03%         | M1                      | B-Precursor      |
| 22 | #R48       | Early             | 29.1                     | NA            | M3                      | B-Precursor      |
| 23 | #R46       | Early             | 30.87                    | 1.17%         | M1                      | B-Precursor      |
| 24 | #R54       | Early             | 32.07                    | 0.62%         | M1                      | B-Precursor      |
| 25 | #R5        | Early             | 32.3                     | Negative      | M1                      | B-Precursor      |
| 26 | #R55       | Early             | 32.3                     | 46%           | M2                      | B-Precursor      |
| 27 | #R25       | Early             | 32.57                    | Negative      | M1                      | B-Precursor      |
| 28 | #R42       | Early             | 33.03                    | 0.85%         | M1                      | B-Precursor      |
| 29 | #R56       | Early             | 34.3                     | NA            | NA                      | B-Precursor      |
| 30 | #R38       | Early             | 34.87                    | NA            | NA                      | B-Precursor      |
| 31 | #R11       | Early             | 35.83                    | Negative      | M1                      | B-Precursor      |
| 32 | #R1        | Early             | 35.93                    | 0.02%         | M1                      | B-Precursor      |
| 33 | #R12*^     | Late              | 36.73                    | NA            | NA                      | B-Precursor      |
| 34 | #R27       | Late              | 38.7                     | 1.30%         | M1                      | B-Precursor      |
| 35 | #R47       | Late              | 43.2                     | 12.40%        | M1                      | B-Precursor      |
| 36 | #R16       | Late              | 44.13                    | Negative      | M1                      | B-Precursor      |
| 37 | #R60*      | Late              | 45.73                    | NA            | NA                      | B-Precursor      |
| 38 | #R26       | Late              | 46.3                     | Negative      | M1                      | B-Precursor      |
| 39 | #R44       | Late              | 46.7                     | 0.65%         | M1                      | B-Precursor      |
| 40 | #R2        | Late              | 48.17                    | Negative      | NA                      | B-Precursor      |
| 41 | #R36       | Late              | 49.33                    | Negative      | NA                      | B-Precursor      |
| 42 | #R35       | Late              | 51                       | Negative      | M1                      | B-Precursor      |
| 43 | #R23       | Late              | 51.1                     | 0.32%         | M1                      | B-Precursor      |
| 44 | #R37       | Late              | 54.1                     | 0.05%         | M1                      | B-Precursor      |
| 45 | #R34       | Late              | 55.9                     | Negative      | M1                      | B-Precursor      |
| 46 | #R51       | Late              | 56.37                    | Negative      | M1                      | B-Precursor      |
| 47 | #R17       | Late              | 58.37                    | NA            | M3                      | B-Precursor      |
| 48 | #R49       | Late              | 71.5                     | Negative      | M1                      | B-Precursor      |
| 49 | #R22       | Late              | 72.93                    | NA            | M1                      | B-Precursor      |
| 50 | #R18       | Late              | 74.07                    | <.01%         | M1                      | B-Precursor      |
| 51 | #R24       | Late              | 79.83                    | Negative      | M1                      | B-Precursor      |
| 52 | #R50       | Late              | 84.83                    | 2%            | M1                      | B-Precursor      |
| 53 | #R32       | Late              | 92.93                    | Negative      | M1                      | B-Precursor      |
| 54 | #R40       | Late              | 105.87                   | 0.04%         | M1                      | B-Precursor      |
| 55 | #R19       | Early             | 8.5                      | 53%           | M3                      | T-cell           |
| 56 | #R39       | Early             | 13.47                    | 16.70%        | M1                      | T-cell           |
| 57 | #R43       | Early             | 18.07                    | NA            | NA                      | T-cell           |
| 58 | #R9        | Early             | 23.1                     | 23%           | M2                      | T-cell           |
| 59 | #R15       | Early             | 27                       | NA            | NA                      | T-cell           |
| 60 | #R58       | Late              | 43.63                    | 0.73%         | M1                      | T-cell           |

\* Infant (at diagnosis)

^ Ph positive

PD; Progressive disease

NA; Not available
