# Supplementary material
Source: PubMed Central journal article supplement (PMC1895482)
Supplement: blood_blood-2006-02-002824_3.pdf [file blood_blood-2006-02-002824_3.pdf]

A: 35 pairs

121 probe sets with FDR<10% and t-test p-value <0.002

| AffyID      | Overall Rank | Rank 1 | Rank 2 | p-value  | FDR (%) | Gene Symbol |
|-------------|--------------|--------|--------|----------|---------|-------------|
| 204642_at   | 1            |        | 1      | 0        | 0.29    | EDG1        |
| 203795_s_at | 2            |        | 2      | 0.000002 | 0.77    | BCL7A       |
| 203554_x_at | 3            | 1      |        | 0.000003 | 0.77    | PTTG1       |
| 200980_s_at | 4            | 2      |        | 0.000004 | 0.79    | PDHA1       |
| 213875_x_at | 5            |        | 3      | 0.000009 | 1.53    | C6orf62     |
| 213166_x_at | 6            | 3      |        | 0.000013 | 1.76    | FLJ14346    |
| 201757_at   | 7            | 4      |        | 0.000014 | 1.76    | NDUFS5      |
| 214095_at   | 8            | 5      |        | 0.000023 | 2.35    | SHMT2       |
| 201001_s_at | 9            | 6      |        | 0.000031 | 2.35    | UBE2V1      |
| 211061_s_at | 10           |        | 4      | 0.000031 | 2.35    | MGAT2       |
| 203796_s_at | 11           |        | 5      | 0.000034 | 2.35    | BCL7A       |
| 200834_s_at | 12           | 7      |        | 0.000034 | 2.35    | RPS21       |
| 206864_s_at | 13           |        | 6      | 0.000035 | 2.35    | HRK         |
| 205437_at   | 14           |        | 7      | 0.000071 | 4.05    | ZNF211      |
| 200061_s_at | 15           | 8      |        | 0.000076 | 4.05    | RPS24       |
| 201134_x_at | 16           | 9      |        | 0.000092 | 4.05    | COX7C       |
| 201896_s_at | 17           | 10     |        | 0.000093 | 4.05    | DDA3        |
| 222039_at   | 18           | 11     |        | 0.000094 | 4.05    | LOC146909   |
| 217491_x_at | 19           | 12     |        | 0.000099 | 4.05    | COX7C       |
| 215227_x_at | 20           | 13     |        | 0.0001   | 4.05    | ACPI        |
| 49485_at    | 21           |        | 8      | 0.000108 | 4.05    | PRDM4       |
| 205558_at   | 22           |        | 9      | 0.00011  | 4.05    | TRAF6       |
| 203989_x_at | 23           | 14     |        | 0.000111 | 4.05    | F2R         |
| 203936_s_at | 24           | 15     |        | 0.000114 | 4.05    | MMP9        |
| 200763_s_at | 25           | 16     |        | 0.000115 | 4.05    | RPLP1       |
| 219105_x_at | 26           | 17     |        | 0.000125 | 4.22    | ORC6L       |
| 202870_s_at | 27           | 18     |        | 0.00013  | 4.24    | CDC20       |
| 201002_s_at | 28           | 19     |        | 0.000139 | 4.36    | UBE2V1      |
| 201897_s_at | 29           | 20     |        | 0.000145 | 4.4     | CKS1B       |
| 200701_at   | 30           | 21     |        | 0.000163 | 4.64    | NPC2        |
| 218662_s_at | 31           | 22     |        | 0.000164 | 4.64    | HCAP-G      |
| 209715_at   | 32           | 23     |        | 0.000188 | 5       | CBX5        |
| 213507_s_at | 33           | 24     |        | 0.000193 | 5       | KPNB1       |
| 214356_s_at | 34           | 25     |        | 0.000194 | 5       | KIAA0368    |
| 202279_at   | 35           | 26     |        | 0.000206 | 5       | C14orf2     |
| 203773_x_at | 36           | 27     |        | 0.00021  | 5       | BLVRA       |
| 202984_s_at | 37           |        | 10     | 0.00021  | 5       | BAG5        |
| 213007_at   | 38           | 28     |        | 0.000224 | 5.17    | FLJ10719    |
| 204334_at   | 39           |        | 11     | 0.000236 | 5.32    | KLF7        |
| 208980_s_at | 40           |        | 12     | 0.000258 | 5.56    | UBC         |
| 218188_s_at | 41           | 29     |        | 0.000275 | 5.56    | TIMM13      |
| 205849_s_at | 42           | 30     |        | 0.00028  | 5.56    | UQCRB       |
| 217256_x_at | 43           | 31     |        | 0.000282 | 5.56    | RPL36A      |
| 201291_s_at | 44           | 32     |        | 0.000284 | 5.56    | TOP2A       |
| 217408_at   | 45           | 33     |        | 0.00029  | 5.56    | MRPS18B     |
| 201046_s_at | 46           | 34     |        | 0.000291 | 5.56    | RAD23A      |
| 201628_s_at | 47           |        | 13     | 0.0003   | 5.6     | RRAGA       |
| 218355_at   | 48           | 35     |        | 0.000309 | 5.6     | KIF4A       |
| 221775_x_at | 49           | 36     |        | 0.000312 | 5.6     | RPL22       |
| 202191_s_at | 50           |        | 14     | 0.000321 | 5.64    | GAS7        |
| 213872_at   | 51           |        | 15     | 0.000356 | 6.13    | C6orf62     |
| 219737_s_at | 52           |        | 16     | 0.000377 | 6.29    | PCDH9       |
| 221547_at   | 53           |        | 17     | 0.000379 | 6.29    | PRPF18      |
| 207132_x_at | 54           | 37     |        | 0.000391 | 6.37    | PFDN5       |
| 209408_at   | 55           | 38     |        | 0.000405 | 6.46    | KIF2C       |
| 222120_at   | 56           |        | 18     | 0.000421 | 6.46    | MGC13138    |
| 204162_at   | 57           | 39     |        | 0.000426 | 6.46    | KNTC2       |
| 222113_s_at | 58           | 40     |        | 0.000432 | 6.46    | EPS15L1     |
| 210448_s_at | 59           |        | 19     | 0.000433 | 6.46    | P2RX5       |
| 201406_at   | 60           | 41     |        | 0.000455 | 6.67    | RPL36AL     |
| 201268_at   | 61           | 42     |        | 0.000487 | 6.72    | NME2        |
| 205131_x_at | 62           | 43     |        | 0.000499 | 6.72    | SCGF        |

|             |     |    |    |          |      |          |
|-------------|-----|----|----|----------|------|----------|
| 203213_at   | 63  | 44 |    | 0.000503 | 6.72 | CDC2     |
| 209066_x_at | 64  | 45 |    | 0.000506 | 6.72 | UQCRB    |
| 200921_s_at | 65  |    | 20 | 0.000507 | 6.72 | BTG1     |
| 203371_s_at | 66  | 46 |    | 0.00051  | 6.72 | NDUFB3   |
| 209398_at   | 67  |    | 21 | 0.000513 | 6.72 | HIST1H1C |
| 208079_s_at | 68  | 47 |    | 0.000529 | 6.75 | STK6     |
| 202233_s_at | 69  | 48 |    | 0.000537 | 6.75 | UQCRH    |
| 221488_s_at | 70  | 49 |    | 0.000537 | 6.75 | C6orf82  |
| 200596_s_at | 71  | 50 |    | 0.00057  | 6.98 | EIF3S10  |
| 209189_at   | 72  |    | 22 | 0.000572 | 6.98 | FOS      |
| 204937_s_at | 73  |    | 23 | 0.000583 | 7.01 | ZNF274   |
| 211685_s_at | 74  | 51 |    | 0.000599 | 7.01 | NCALD    |
| 203313_s_at | 75  |    | 24 | 0.000601 | 7.01 | TGIF     |
| 202276_at   | 76  | 52 |    | 0.000606 | 7.01 | SHFM1    |
| 217028_at   | 77  |    | 25 | 0.000614 | 7.01 | CXCR4    |
| 218320_s_at | 78  | 53 |    | 0.000623 | 7.02 | P17.3    |
| 208892_s_at | 79  |    | 26 | 0.000636 | 7.07 | DUSP6    |
| 204715_at   | 80  |    | 27 | 0.000665 | 7.16 | PANX1    |
| 202648_at   | 81  | 54 |    | 0.000668 | 7.16 | RPS19    |
| 212995_x_at | 82  | 55 |    | 0.000669 | 7.16 | FLJ14346 |
| 202095_s_at | 83  | 56 |    | 0.000676 | 7.16 | BIRC5    |
| 211047_x_at | 84  | 57 |    | 0.000703 | 7.35 | AP2S1    |
| 202193_at   | 85  | 58 |    | 0.000711 | 7.35 | LIMK2    |
| 214789_x_at | 86  |    | 28 | 0.000732 | 7.41 | SRP46    |
| 203775_at   | 87  | 59 |    | 0.000735 | 7.41 | SLC25A13 |
| 212227_x_at | 88  |    | 29 | 0.000742 | 7.41 | SUI1     |
| 201072_s_at | 89  | 60 |    | 0.000761 | 7.51 | SMARCC1  |
| 206555_s_at | 90  |    | 30 | 0.000817 | 7.9  | FLJ20274 |
| 210980_s_at | 91  | 61 |    | 0.000818 | 7.9  | ASAH1    |
| 208764_s_at | 92  | 62 |    | 0.000843 | 7.96 | ATP5G2   |
| 200655_s_at | 93  |    | 31 | 0.000848 | 7.96 | CALM1    |
| 204257_at   | 94  |    | 32 | 0.000851 | 7.96 | FADS3    |
| 218926_at   | 95  |    | 33 | 0.000861 | 7.96 | MYNN     |
| 219711_at   | 96  |    | 34 | 0.000885 | 8.07 | ZNF586   |
| 211729_x_at | 97  | 63 |    | 0.000897 | 8.07 | BLVRA    |
| 211709_s_at | 98  | 64 |    | 0.000899 | 8.07 | SCGF     |
| 219549_s_at | 99  | 65 |    | 0.000942 | 8.3  | RTN3     |
| 213377_x_at | 100 | 66 |    | 0.000944 | 8.3  | RPS12    |
| 215479_at   | 101 |    | 35 | 0.000959 | 8.35 |          |
| 202110_at   | 102 | 67 |    | 0.00098  | 8.4  | COX7B    |
| 202495_at   | 103 |    | 36 | 0.000999 | 8.4  | TBCC     |
| 201236_s_at | 104 |    | 37 | 0.001004 | 8.4  | BTG2     |
| 220094_s_at | 105 | 68 |    | 0.001006 | 8.4  | C6orf79  |
| 206656_s_at | 106 | 69 |    | 0.001013 | 8.4  | MYOD1    |
| 209152_s_at | 107 |    | 38 | 0.001042 | 8.49 | TCF3     |
| 219192_at   | 108 | 70 |    | 0.001046 | 8.49 | UBAP2    |
| 209201_x_at | 109 |    | 39 | 0.001055 | 8.49 | CXCR4    |
| 214751_at   | 110 |    | 40 | 0.001063 | 8.49 | LOC90333 |
| 202378_s_at | 111 | 71 |    | 0.001073 | 8.5  | OBRGRP   |
| 200909_s_at | 112 | 72 |    | 0.0011   | 8.64 | RPLP2    |
| 202782_s_at | 113 |    | 41 | 0.001127 | 8.68 | SKIP     |
| 205129_at   | 114 | 73 |    | 0.001137 | 8.68 | NPM3     |
| 208891_at   | 115 |    | 42 | 0.001144 | 8.68 | DUSP6    |
| 208984_x_at | 116 | 74 |    | 0.001146 | 8.68 | RBM10    |
| 201928_at   | 117 | 75 |    | 0.00118  | 8.82 | PKP4     |
| 209323_at   | 118 |    | 43 | 0.001184 | 8.82 | PRKRIR   |
| 201306_s_at | 119 | 76 |    | 0.001218 | 9    | ANP32B   |
| 209565_at   | 120 |    | 44 | 0.001286 | 9.42 | ZNF183   |
| 211296_x_at | 121 |    | 45 | 0.001371 | 9.96 | UBC      |

Rank 1 = ranks of probe sets with expression values being high in Diagnosis Group

Rank 2 = ranks of probe sets with expression values being high in Relapse Group

B: 32 pairs; precursor B

126 probe sets with FDR<10% and t-test p-value <0.002

| AffyID      | Overall Rank | Rank 1 | Rank 2 | p-value  | FDR (%) | Gene Symbol |
|-------------|--------------|--------|--------|----------|---------|-------------|
| 204642_at   | 1            | 1      |        | 0.000001 | 0.66    | EDG1        |
| 203795_s_at | 2            | 2      |        | 0.000002 | 0.66    | BCL7A       |
| 203554_x_at | 3            |        | 1      | 0.000003 | 0.97    | PTTG1       |
| 200834_s_at | 4            |        | 2      | 0.00001  | 2.11    | RPS21       |
| 200763_s_at | 5            |        | 3      | 0.000016 | 2.11    | RPLP1       |
| 213166_x_at | 6            |        | 4      | 0.000017 | 2.11    | FLJ14346    |
| 201757_at   | 7            |        | 5      | 0.000019 | 2.11    | NDUFS5      |
| 200980_s_at | 8            |        | 6      | 0.000021 | 2.11    | PDHA1       |
| 203796_s_at | 9            | 3      |        | 0.000023 | 2.11    | BCL7A       |
| 203989_x_at | 10           |        | 7      | 0.000026 | 2.11    | F2R         |
| 200061_s_at | 11           |        | 8      | 0.000029 | 2.11    | RPS24       |
| 201001_s_at | 12           |        | 9      | 0.000029 | 2.11    | UBE2V1      |
| 212834_at   | 13           |        | 10     | 0.000031 | 2.11    | DDX52       |
| 213875_x_at | 14           | 4      |        | 0.000034 | 2.12    | C6orf62     |
| 208892_s_at | 15           | 5      |        | 0.000044 | 2.51    | DUSP6       |
| 206864_s_at | 16           | 6      |        | 0.000048 | 2.51    | HRK         |
| 217491_x_at | 17           |        | 11     | 0.000049 | 2.51    | COX7C       |
| 201002_s_at | 18           |        | 12     | 0.000052 | 2.51    | UBE2V1      |
| 202279_at   | 19           |        | 13     | 0.000054 | 2.51    | C14orf2     |
| 49485_at    | 20           | 7      |        | 0.000057 | 2.51    | PRDM4       |
| 211061_s_at | 21           | 8      |        | 0.000062 | 2.58    | MGAT2       |
| 222039_at   | 22           |        | 14     | 0.00007  | 2.81    | LOC146909   |
| 215227_x_at | 23           |        | 15     | 0.000087 | 3.31    | ACPI        |
| 201134_x_at | 24           |        | 16     | 0.000093 | 3.4     | COX7C       |
| 205558_at   | 25           | 9      |        | 0.000102 | 3.44    | TRAF6       |
| 202984_s_at | 26           | 10     |        | 0.00011  | 3.44    | BAG5        |
| 219105_x_at | 27           |        | 17     | 0.000114 | 3.44    | ORC6L       |
| 221775_x_at | 28           |        | 18     | 0.000116 | 3.44    | RPL22       |
| 201046_s_at | 29           |        | 19     | 0.000117 | 3.44    | RAD23A      |
| 200655_s_at | 30           | 11     |        | 0.000118 | 3.44    | CALM1       |
| 203936_s_at | 31           |        | 20     | 0.000135 | 3.82    | MMP9        |
| 202870_s_at | 32           |        | 21     | 0.00016  | 4.28    | CDC20       |
| 208891_at   | 33           | 12     |        | 0.000161 | 4.28    | DUSP6       |
| 202648_at   | 34           |        | 22     | 0.000176 | 4.54    | RPS19       |
| 210448_s_at | 35           | 13     |        | 0.000181 | 4.55    | P2RX5       |
| 201897_s_at | 36           |        | 23     | 0.000191 | 4.67    | CKS1B       |
| 214095_at   | 37           |        | 24     | 0.000199 | 4.68    | SHMT2       |
| 205437_at   | 38           | 14     |        | 0.000209 | 4.68    | ZNF211      |
| 202095_s_at | 39           |        | 25     | 0.000221 | 4.68    | BIRC5       |
| 217256_x_at | 40           |        | 26     | 0.000223 | 4.68    | RPL36A      |
| 203213_at   | 41           |        | 27     | 0.000224 | 4.68    | CDC2        |
| 204334_at   | 42           | 15     |        | 0.000229 | 4.68    | KLF7        |
| 214789_x_at | 43           | 16     |        | 0.000229 | 4.68    | SRP46       |
| 205849_s_at | 44           |        | 28     | 0.000245 | 4.89    | UQCRB       |
| 201406_at   | 45           |        | 29     | 0.000264 | 5.15    | RPL36AL     |
| 201268_at   | 46           |        | 30     | 0.000281 | 5.19    | NME2        |
| 207132_x_at | 47           |        | 31     | 0.000282 | 5.19    | PFDN5       |

|             |    |    |    |          |      |          |
|-------------|----|----|----|----------|------|----------|
| 204162_at   | 48 |    | 32 | 0.000287 | 5.19 | KNTC2    |
| 201896_s_at | 49 |    | 33 | 0.000293 | 5.19 | DDA3     |
| 202191_s_at | 50 | 17 |    | 0.000296 | 5.19 | GAS7     |
| 209398_at   | 51 | 18 |    | 0.000301 | 5.19 | HIST1H1C |
| 203773_x_at | 52 |    | 34 | 0.000317 | 5.35 | BLVRA    |
| 205677_s_at | 53 |    | 35 | 0.000323 | 5.35 | DLEU1    |
| 209715_at   | 54 |    | 36 | 0.000329 | 5.36 | CBX5     |
| 219737_s_at | 55 | 19 |    | 0.000342 | 5.38 | PCDH9    |
| 208980_s_at | 56 | 20 |    | 0.000351 | 5.38 | UBC      |
| 209408_at   | 57 |    | 37 | 0.000357 | 5.38 | KIF2C    |
| 201236_s_at | 58 | 21 |    | 0.00036  | 5.38 | BTG2     |
| 214356_s_at | 59 |    | 38 | 0.000362 | 5.38 | KIAA0368 |
| 222113_s_at | 60 |    | 39 | 0.000371 | 5.44 | EPS15L1  |
| 221547_at   | 61 | 22 |    | 0.000396 | 5.66 | PRPF18   |
| 201041_s_at | 62 | 23 |    | 0.0004   | 5.66 | DUSP1    |
| 213007_at   | 63 |    | 40 | 0.000431 | 5.97 | FLJ10719 |
| 213872_at   | 64 | 24 |    | 0.000435 | 5.97 | C6orf62  |
| 213377_x_at | 65 |    | 41 | 0.000447 | 6.04 | RPS12    |
| 201628_s_at | 66 | 25 |    | 0.000453 | 6.04 | RRAGA    |
| 218662_s_at | 67 |    | 42 | 0.000466 | 6.04 | HCAP-G   |
| 214366_s_at | 68 | 26 |    | 0.000468 | 6.04 | ALOX5    |
| 37028_at    | 69 | 27 |    | 0.000476 | 6.06 | PPP1R15A |
| 204319_s_at | 70 |    | 43 | 0.000492 | 6.17 | RGS10    |
| 201291_s_at | 71 |    | 44 | 0.000527 | 6.43 | TOP2A    |
| 200701_at   | 72 |    | 45 | 0.000533 | 6.43 | NPC2     |
| 202233_s_at | 73 |    | 46 | 0.00054  | 6.43 | UQCRH    |
| 204151_x_at | 74 |    | 47 | 0.000542 | 6.43 | AKR1C1   |
| 219031_s_at | 75 | 28 |    | 0.000551 | 6.45 | CGI-37   |
| 211047_x_at | 76 |    | 48 | 0.000567 | 6.49 | AP2S1    |
| 218355_at   | 77 |    | 49 | 0.000569 | 6.49 | KIF4A    |
| 202705_at   | 78 |    | 50 | 0.000582 | 6.51 | CCNB2    |
| 209066_x_at | 79 |    | 51 | 0.000585 | 6.51 | UQCRB    |
| 219549_s_at | 80 |    | 52 | 0.000594 | 6.52 | RTN3     |
| 201094_at   | 81 |    | 53 | 0.000618 | 6.7  | RPS29    |
| 208079_s_at | 82 |    | 54 | 0.000629 | 6.74 | STK6     |
| 218188_s_at | 83 |    | 55 | 0.000646 | 6.84 | TIMM13   |
| 200949_x_at | 84 |    | 56 | 0.000681 | 7.12 | RPS20    |
| 219711_at   | 85 | 29 |    | 0.000691 | 7.14 | ZNF586   |
| 218320_s_at | 86 |    | 57 | 0.00074  | 7.56 | P17.3    |
| 212995_x_at | 87 |    | 58 | 0.00079  | 7.98 | FLJ14346 |
| 202495_at   | 88 | 30 |    | 0.000814 | 8.13 | TBCC     |
| 201258_at   | 89 |    | 59 | 0.000841 | 8.16 | RPS16    |
| 202782_s_at | 90 | 31 |    | 0.000845 | 8.16 | SKIP     |
| 200909_s_at | 91 |    | 60 | 0.000846 | 8.16 | RPLP2    |
| 222120_at   | 92 | 32 |    | 0.000883 | 8.39 | MGC13138 |
| 206555_s_at | 93 | 33 |    | 0.000888 | 8.39 | FLJ20274 |
| 200086_s_at | 94 |    | 61 | 0.000924 | 8.61 | COX4I1   |
| 200921_s_at | 95 | 34 |    | 0.000943 | 8.61 | BTG1     |
| 200818_at   | 96 |    | 62 | 0.000956 | 8.61 | ATP5O    |
| 209189_at   | 97 | 35 |    | 0.000957 | 8.61 | FOS      |
| 217408_at   | 98 |    | 63 | 0.00096  | 8.61 | MRPS18B  |
| 202276_at   | 99 |    | 64 | 0.000998 | 8.78 | SHFM1    |

|             |     |    |    |          |      |          |
|-------------|-----|----|----|----------|------|----------|
| 202110_at   | 100 |    | 65 | 0.001002 | 8.78 | COX7B    |
| 200674_s_at | 101 |    | 66 | 0.00101  | 8.78 | RPL32    |
| 212643_at   | 102 | 36 |    | 0.00102  | 8.79 | C14orf32 |
| 221737_at   | 103 | 37 |    | 0.001049 | 8.94 | GNA12    |
| 217028_at   | 104 | 38 |    | 0.001066 | 9.01 | CXCR4    |
| 201477_s_at | 105 |    | 67 | 0.001098 | 9.19 | RRM1     |
| 202193_at   | 106 |    | 68 | 0.001116 | 9.25 | LIMK2    |
| 213649_at   | 107 | 39 |    | 0.001161 | 9.53 | SFRS7    |
| 200652_at   | 108 |    | 69 | 0.001179 | 9.54 | SSR2     |
| 217879_at   | 109 |    | 70 | 0.001188 | 9.54 | CDC27    |
| 204715_at   | 110 | 40 |    | 0.001203 | 9.54 | PANX1    |
| 220287_at   | 111 | 41 |    | 0.001206 | 9.54 | ADAMTS9  |
| 212227_x_at | 112 | 42 |    | 0.001234 | 9.67 | SUI1     |
| 201695_s_at | 113 | 43 |    | 0.001247 | 9.67 | NP       |
| 202503_s_at | 114 |    | 71 | 0.00127  | 9.67 | KIAA0101 |
| 204937_s_at | 115 | 44 |    | 0.001276 | 9.67 | ZNF274   |
| 221488_s_at | 116 |    | 72 | 0.001276 | 9.67 | C6orf82  |
| 209323_at   | 117 | 45 |    | 0.001306 | 9.67 | PRKRIR   |
| 202647_s_at | 118 | 46 |    | 0.001308 | 9.67 | NRAS     |
| 206656_s_at | 119 |    | 73 | 0.001321 | 9.67 | MYOD1    |
| 210532_s_at | 120 |    | 74 | 0.001325 | 9.67 | C14orf2  |
| 214431_at   | 121 |    | 75 | 0.001333 | 9.67 | GMPS     |
| 212007_at   | 122 |    | 76 | 0.001348 | 9.67 | UBXD2    |
| 202947_s_at | 123 |    | 77 | 0.001359 | 9.67 | GYPC     |
| 213507_s_at | 124 |    | 78 | 0.001365 | 9.67 | KPNB1    |
| 222303_at   | 125 | 47 |    | 0.001409 | 9.9  |          |
| 201161_s_at | 126 | 48 |    | 0.001429 | 9.96 | CSDA     |

Rank 1 = ranks of probe sets with expression values being high in Diagnosis Group

Rank 2 = ranks of probe sets with expression values being high in Relapse Group

C: 23 pairs; early relapse

73 probe sets with FDR<10% and t-test p-value <0.001

| AffyID      | Overall Rank | Rank 1 | Rank 2 | p-value  | FDR (%) | Gene Symbol |
|-------------|--------------|--------|--------|----------|---------|-------------|
| 214327_x_at | 1            | 1      |        | 0.000007 | 2.71    | TPT1        |
| 212227_x_at | 2            | 2      |        | 0.000009 | 2.71    | SUI1        |
| 202095_s_at | 3            |        | 1      | 0.000009 | 2.71    | BIRC5       |
| 212949_at   | 4            |        | 2      | 0.000023 | 3.43    | BRRN1       |
| 202021_x_at | 5            | 3      |        | 0.000027 | 3.43    | SUI1        |
| 201199_s_at | 6            |        | 3      | 0.000027 | 3.43    | PSMD1       |
| 214095_at   | 7            |        | 4      | 0.000031 | 3.43    | SHMT2       |
| 212130_x_at | 8            | 4      |        | 0.000034 | 3.43    | SUI1        |
| 203554_x_at | 9            |        | 5      | 0.000035 | 3.43    | PTTG1       |
| 213166_x_at | 10           |        | 6      | 0.000041 | 3.67    | FLJ14346    |
| 213007_at   | 11           |        | 7      | 0.000053 | 4.27    | FLJ10719    |
| 203213_at   | 12           |        | 8      | 0.00007  | 4.68    | CDC2        |
| 222039_at   | 13           |        | 9      | 0.000075 | 4.68    | LOC146909   |
| 212995_x_at | 14           |        | 10     | 0.000078 | 4.68    | FLJ14346    |
| 200980_s_at | 15           |        | 11     | 0.000079 | 4.68    | PDHA1       |
| 214426_x_at | 16           |        | 12     | 0.000094 | 4.94    | CHAF1A      |
| 212869_x_at | 17           | 5      |        | 0.000101 | 4.94    | TPT1        |
| 212284_x_at | 18           | 6      |        | 0.000106 | 4.94    | TPT1        |
| 209189_at   | 19           | 7      |        | 0.000107 | 4.94    | FOS         |
| 205677_s_at | 20           |        | 13     | 0.000111 | 4.94    | DLEU1       |
| 219192_at   | 21           |        | 14     | 0.000171 | 6.85    | UBAP2       |
| 209715_at   | 22           |        | 15     | 0.000174 | 6.85    | CBX5        |
| 218320_s_at | 23           |        | 16     | 0.000179 | 6.85    | P17.3       |
| 204257_at   | 24           | 8      |        | 0.000186 | 6.85    | FADS3       |
| 202870_s_at | 25           |        | 17     | 0.000198 | 6.85    | CDC20       |
| 201210_at   | 26           | 9      |        | 0.000206 | 6.85    | DDX3X       |
| 202844_s_at | 27           |        | 18     | 0.000214 | 6.85    | RALBP1      |
| 209408_at   | 28           |        | 19     | 0.000216 | 6.85    | KIF2C       |
| 204642_at   | 29           | 10     |        | 0.000239 | 6.96    | EDG1        |
| 214096_s_at | 30           |        | 20     | 0.000241 | 6.96    | SHMT2       |
| 204937_s_at | 31           | 11     |        | 0.000243 | 6.96    | ZNF274      |
| 218662_s_at | 32           |        | 21     | 0.000271 | 7.46    | HCAP-G      |
| 217672_x_at | 33           | 12     |        | 0.000277 | 7.46    | SUI1        |
| 212022_s_at | 34           |        | 22     | 0.000285 | 7.46    | MKI67       |
| 200596_s_at | 35           |        | 23     | 0.000316 | 7.87    | EIF3S10     |
| 217408_at   | 36           |        | 24     | 0.000337 | 7.87    | MRPS18B     |
| 218732_at   | 37           |        | 25     | 0.000351 | 7.87    | Bit1        |
| 205129_at   | 38           |        | 26     | 0.000354 | 7.87    | NPM3        |
| 211047_x_at | 39           |        | 27     | 0.000365 | 7.87    | AP2S1       |
| 222113_s_at | 40           |        | 28     | 0.000367 | 7.87    | EPS15L1     |
| 218741_at   | 41           |        | 29     | 0.000374 | 7.87    | C22orf18    |
| 203795_s_at | 42           | 13     |        | 0.000387 | 7.87    | BCL7A       |
| 201477_s_at | 43           |        | 30     | 0.0004   | 7.87    | RRM1        |
| 204767_s_at | 44           |        | 31     | 0.000408 | 7.87    | FEN1        |
| 39729_at    | 45           |        | 32     | 0.00041  | 7.87    | PRDX2       |
| 202705_at   | 46           |        | 33     | 0.000415 | 7.87    | CCNB2       |
| 202648_at   | 47           |        | 34     | 0.000416 | 7.87    | RPS19       |

|             |    |    |    |          |      |          |
|-------------|----|----|----|----------|------|----------|
| 49485_at    | 48 | 14 |    | 0.000435 | 8.05 | PRDM4    |
| 204162_at   | 49 |    | 35 | 0.000447 | 8.12 | KNTC2    |
| 212515_s_at | 50 | 15 |    | 0.00046  | 8.17 | DDX3X    |
| 208079_s_at | 51 |    | 36 | 0.000496 | 8.61 | STK6     |
| 211943_x_at | 52 | 16 |    | 0.000503 | 8.61 | TPT1     |
| 214683_s_at | 53 | 17 |    | 0.000563 | 9.08 | CLK1     |
| 201291_s_at | 54 |    | 37 | 0.000566 | 9.08 | TOP2A    |
| 201897_s_at | 55 |    | 38 | 0.00057  | 9.08 | CKS1B    |
| 200679_x_at | 56 |    | 39 | 0.000573 | 9.08 | HMGB1    |
| 214366_s_at | 57 | 18 |    | 0.000582 | 9.08 | ALOX5    |
| 205550_s_at | 58 |    | 40 | 0.0006   | 9.2  | BRE      |
| 219312_s_at | 59 | 19 |    | 0.000613 | 9.24 | ZBTB10   |
| 53071_s_at  | 60 |    | 41 | 0.000626 | 9.27 | FLJ22222 |
| 202153_s_at | 61 |    | 42 | 0.000643 | 9.28 | NUP62    |
| 215227_x_at | 62 |    | 43 | 0.000653 | 9.28 | ACP1     |
| 200763_s_at | 63 |    | 44 | 0.000659 | 9.28 | RPLP1    |
| 213875_x_at | 64 | 20 |    | 0.000668 | 9.28 | C6orf62  |
| 209323_at   | 65 | 21 |    | 0.000688 | 9.4  | PRKRIR   |
| 205437_at   | 66 | 22 |    | 0.000704 | 9.4  | ZNF211   |
| 201306_s_at | 67 |    | 45 | 0.000708 | 9.4  | ANP32B   |
| 213008_at   | 68 |    | 46 | 0.000753 | 9.84 | FLJ10719 |
| 205859_at   | 69 | 23 |    | 0.000787 | 9.9  | LY86     |
| 214794_at   | 70 |    | 47 | 0.000789 | 9.9  | PA2G4    |
| 209795_at   | 71 | 24 |    | 0.000805 | 9.9  | CD69     |
| 206102_at   | 72 |    | 48 | 0.000808 | 9.9  | KIAA0186 |
| 202503_s_at | 73 |    | 49 | 0.000813 | 9.9  | KIAA0101 |

Rank 1 = ranks of probe sets with expression values being high in Diagnosis Group

Rank 2 = ranks of probe sets with expression values being high in Relapse Group
