# Supplementary material
Source: PubMed Central journal article supplement (PMC1895482)
Supplement: blood_blood-2006-02-002824_4.pdf [file blood_blood-2006-02-002824_4.pdf]

A

| Rank | ANOVA Cluster UL vs. others |          | ANOVA Cluster MR vs. others |          | ANOVA Cluster LL vs. others |          |
|------|-----------------------------|----------|-----------------------------|----------|-----------------------------|----------|
|      | Probe Set                   | Gene     | Probe Set                   | Gene     | Probe Set                   | Gene     |
| 1    | 213801_x_at                 | LAMR1    | 201487_at                   | CTSC     | 203743_s_at                 | TDG      |
| 2    | 202009_at                   | PTK9L    | 208716_s_at                 | LOC54499 | 34846_at                    | CAMK2B   |
| 3    | 218386_x_at                 | USP16    | 212946_at                   | KIAA0564 | 32811_at                    | MYO1C    |
| 4    | 221798_x_at                 | RPS2     | 218984_at                   | FLJ20485 | 202266_at                   | TTRAP    |
| 5    | 221767_x_at                 | HDLBP    | 212896_at                   | KIAA0052 | 201532_at                   | PSMA3    |
| 6    | 206147_x_at                 | SCML2    | 215165_x_at                 | UMPS     | 202088_at                   | SLC39A6  |
| 7    | 218793_s_at                 | SCML1    | 203465_at                   | MRPL19   | 212707_s_at                 | RASA4    |
| 8    | 203593_at                   | CD2AP    | 208696_at                   | CCT5     | 219445_at                   | GLTSCR1  |
| 9    | 210257_x_at                 | CUL4B    | 208787_at                   | MRPL3    | 212296_at                   | PSMD14   |
| 10   | 44065_at                    | FLJ14827 | 208393_s_at                 | RAD50    | 48659_at                    | FLJ12438 |

B

| Lower Left | Middle Right | Upper Left |
|------------|--------------|------------|
| #R41       | #R43         | #R4        |
| #R42       | #R45         | #R5        |
| #R48       | #R46         | #R54       |
| #R52       | #R53         | #R56       |
| #R55       | #R6          | #R7        |
| #R59       | #R8          | #R1        |
| #R61       | #R9          | #R11       |
| #R21       | #R10         | #R14       |
| #R29       | #R13         | #R28       |
| #R31       | #R15         | #R47       |
| #R38       | #R19         | #R51       |
| #R40       | #R20         | #R16       |
| #R44       | #R25         | #R17       |
| #R49       | #R3          | #R18       |
| #R50       | #R30         | #R2        |
| #R58       | #R33         | #R24       |
| #R60       | #R39         | #R26       |
| #R12       | #R27         |            |
| #R22       | #R34         |            |
| #R23       | #R37         |            |
| #R32       |              |            |
| #R35       |              |            |
| #R36       |              |            |
