# Supplementary material
Source: PubMed Central journal article supplement (PMC1895482)
Supplement: blood_blood-2006-02-002824_5.pdf [file blood_blood-2006-02-002824_5.pdf]

## A: Early vs. Late relapse: Binary Classification

54 Precursor B-ALL Cases, 115 probe sets are selected with FDR cutoff 2.51%

| AffyID      | Overall Rank | Rank 1 | Rank 2 | p-value | FDR (%) | Gene Symbol |
|-------------|--------------|--------|--------|---------|---------|-------------|
| 212694_s_at | 1            | 1      |        | 1.5E-05 | 0       | PCCB        |
| 210346_s_at | 2            |        | 1      | 1.5E-05 | 0       | CLK1        |
| 205407_at   | 3            |        | 2      | 2.1E-05 | 0       | RECK        |
| 202705_at   | 4            | 2      |        | 6.4E-05 | 0       | CCNB2       |
| 209251_x_at | 5            | 3      |        | 5.6E-05 | 0       | TUBA6       |
| 218662_s_at | 6            | 4      |        | 0.00017 | 0       | HCAP-G      |
| 212639_x_at | 7            | 5      |        | 0.00013 | 0       | K-ALPHA-1   |
| 201013_s_at | 8            | 6      |        | 0.00023 | 0       | PAICS       |
| 211072_x_at | 9            | 7      |        | 0.00015 | 0       | K-ALPHA-1   |
| 201014_s_at | 10           | 8      |        | 0.00024 | 0       | PAICS       |
| 213646_x_at | 11           | 9      |        | 0.00019 | 0       | K-ALPHA-1   |
| 210999_s_at | 12           |        | 3      | 0.00025 | 0       | GRB10       |
| 211750_x_at | 13           | 10     |        | 0.00018 | 0       | TUBA6       |
| 209123_at   | 14           | 11     |        | 0.00022 | 0       | QDPR        |
| 218663_at   | 15           | 12     |        | 0.00014 | 0       | HCAP-G      |
| 202573_at   | 16           |        | 4      | 9.6E-05 | 0       | CSNK1G2     |
| 202503_s_at | 17           | 13     |        | 0.00033 | 0       | KIAA0101    |
| 211058_x_at | 18           | 14     |        | 0.00021 | 0       | K-ALPHA-1   |
| 202143_s_at | 19           | 15     |        | 2.6E-05 | 0       | COPS8       |
| 203401_at   | 20           | 16     |        | 0.0004  | 0       | PRPS2       |
| 201980_s_at | 21           | 17     |        | 0.00032 | 0       | RSU1        |
| 204444_at   | 22           | 18     |        | 0.00057 | 0       | KIF11       |
| 203362_s_at | 23           | 19     |        | 0.00055 | 0       | MAD2L1      |
| 202095_s_at | 24           | 20     |        | 0.00039 | 0       | BIRC5       |
| 204822_at   | 25           | 21     |        | 0.00035 | 0       | TTK         |
| 201897_s_at | 26           | 22     |        | 0.00037 | 0       | CKS1B       |
| 202309_at   | 27           | 23     |        | 0.00034 | 0       | MTHFD1      |
| 202345_s_at | 28           | 24     |        | 0.00049 | 0       | FABP5       |
| 200957_s_at | 29           | 25     |        | 0.00019 | 0       | SSRP1       |
| 217917_s_at | 30           | 26     |        | 9.5E-05 | 0       | DNCL2A      |
| 204170_s_at | 31           | 27     |        | 0.00054 | 0       | CKS2        |
| 220692_at   | 32           |        | 5      | 0.00026 | 0       | HSPC047     |
| 204184_s_at | 33           |        | 6      | 1.4E-05 | 0       | ADRBK2      |
| 215856_at   | 34           |        | 7      | 0.00077 | 0       | CD33L3      |
| 217942_at   | 35           | 28     |        | 0.00047 | 0       | MRPS35      |
| 212496_s_at | 36           |        | 8      | 0.00048 | 0       | JMJD2B      |
| 200650_s_at | 37           | 29     |        | 0.00036 | 0       | LDHA        |
| 209714_s_at | 38           | 30     |        | 0.00048 | 1.45    | CDKN3       |
| 212020_s_at | 39           | 31     |        | 0.00015 | 1.45    | MKI67       |
| 219623_at   | 40           |        | 9      | 0.00035 | 1.45    | ACTR5       |
| 202447_at   | 41           | 32     |        | 0.00047 | 1.45    | DECR1       |
| 200654_at   | 42           | 33     |        | 0.00036 | 1.45    | P4HB        |
| 219722_s_at | 43           |        | 10     | 8.6E-05 | 1.45    | MGC4171     |
| 201090_x_at | 44           | 34     |        | 0.00061 | 1.45    | K-ALPHA-1   |
| 200681_at   | 45           | 35     |        | 0.00075 | 1.45    | GLO1        |
| 201391_at   | 46           | 36     |        | 0.00035 | 1.45    | TRAP1       |
| 212359_s_at | 47           |        | 11     | 0.00033 | 1.45    | KIAA0913    |
| 213792_s_at | 48           |        | 12     | 0.00084 | 1.45    | INSR        |
| 219256_s_at | 49           |        | 13     | 0.00086 | 1.45    | SH3TC1      |

|             |     |    |    |         |      |          |
|-------------|-----|----|----|---------|------|----------|
| 201590_x_at | 50  | 37 |    | 0.00112 | 1.45 | ANXA2    |
| 221773_at   | 51  |    | 14 | 0.00147 | 1.45 | ELK3     |
| 208322_s_at | 52  |    | 15 | 0.00037 | 1.45 | SIAT4A   |
| 202519_at   | 53  |    | 16 | 0.0008  | 1.45 | MONDOA   |
| 212873_at   | 54  |    | 17 | 0.00058 | 1.45 | HA-1     |
| 218308_at   | 55  | 38 |    | 0.00034 | 1.45 | TACC3    |
| 201030_x_at | 56  | 39 |    | 0.00068 | 1.45 | LDHB     |
| 210052_s_at | 57  | 40 |    | 0.00071 | 1.45 | TPX2     |
| 212949_at   | 58  | 41 |    | 0.00034 | 1.45 | BRRN1    |
| 40225_at    | 59  |    | 18 | 0.00057 | 1.45 | GAK      |
| 203710_at   | 60  |    | 19 | 0.00135 | 1.45 | ITPR1    |
| 202678_at   | 61  | 42 |    | 0.00057 | 1.45 | GTF2A2   |
| 213618_at   | 62  |    | 20 | 0.00136 | 1.45 | CENTD1   |
| 202209_at   | 63  | 43 |    | 0.00041 | 1.45 | LSM3     |
| 210282_at   | 64  |    | 21 | 0.00029 | 2.36 | ZNF198   |
| 202854_at   | 65  | 44 |    | 0.00153 | 2.36 | HPRT1    |
| 208770_s_at | 66  | 45 |    | 0.00018 | 2.36 | EIF4EBP2 |
| 211626_x_at | 67  |    | 22 | 0.00119 | 2.36 | ERG      |
| 219359_at   | 68  |    | 23 | 0.00163 | 2.36 | FLJ22635 |
| 211995_x_at | 69  | 46 |    | 0.00099 | 2.36 | ACTG1    |
| 218425_at   | 70  |    | 24 | 0.00016 | 2.36 | TRIAD3   |
| 35666_at    | 71  |    | 25 | 0.00161 | 2.36 | SEMA3F   |
| 201292_at   | 72  | 47 |    | 0.00172 | 2.36 | TOP2A    |
| 207157_s_at | 73  | 48 |    | 0.00073 | 2.36 | GNG5     |
| 218355_at   | 74  | 49 |    | 0.00107 | 2.36 | KIF4A    |
| 217848_s_at | 75  | 50 |    | 0.00174 | 2.36 | PP       |
| 204162_at   | 76  | 51 |    | 0.00171 | 2.36 | KNTC2    |
| 203554_x_at | 77  | 52 |    | 0.00133 | 2.36 | PTTG1    |
| 210156_s_at | 78  | 53 |    | 0.00015 | 2.36 | PCMT1    |
| 213564_x_at | 79  | 54 |    | 0.00079 | 2.36 | LDHB     |
| 218039_at   | 80  | 55 |    | 0.00172 | 2.36 | NUSAP1   |
| 210427_x_at | 81  | 56 |    | 0.00177 | 2.36 | ANXA2    |
| 201563_at   | 82  | 57 |    | 0.00144 | 2.36 | SORD     |
| 207857_at   | 83  |    | 26 | 0.00165 | 2.36 | LILRA2   |
| 204887_s_at | 84  | 58 |    | 0.00102 | 2.36 | PLK4     |
| 208002_s_at | 85  | 59 |    | 0.00153 | 2.36 | BACH     |
| 211935_at   | 86  | 60 |    | 0.00158 | 2.36 | ARL6IP   |
| 218829_s_at | 87  |    | 27 | 0.00131 | 2.36 | KIAA1416 |
| 212281_s_at | 88  | 61 |    | 0.00207 | 2.36 | MAC30    |
| 210580_x_at | 89  |    | 28 | 0.00106 | 2.36 | SULT1A3  |
| 201291_s_at | 90  | 62 |    | 0.00225 | 2.36 | TOP2A    |
| 212296_at   | 91  | 63 |    | 0.00158 | 2.36 | PSMD14   |
| 212959_s_at | 92  |    | 29 | 0.00175 | 2.36 | MGC4170  |
| 204119_s_at | 93  | 64 |    | 0.00169 | 2.36 | ADK      |
| 213503_x_at | 94  | 65 |    | 0.00205 | 2.36 | ANXA2    |
| 212971_at   | 95  |    | 30 | 0.00132 | 2.36 | CARS     |
| 214710_s_at | 96  | 66 |    | 0.00235 | 2.36 | CCNB1    |
| 202954_at   | 97  | 67 |    | 0.00135 | 2.36 | UBE2C    |
| 220036_s_at | 98  |    | 31 | 0.00104 | 2.51 | LIMR     |
| 219493_at   | 99  | 68 |    | 0.0015  | 2.51 | SHCBP1   |
| 200903_s_at | 100 | 69 |    | 0.0013  | 2.51 | AHCY     |
| 210338_s_at | 101 | 70 |    | 0.0017  | 2.51 | HSPA8    |
| 202441_at   | 102 | 71 |    | 0.0021  | 2.51 | C10orf69 |

|             |     |    |    |         |      |         |
|-------------|-----|----|----|---------|------|---------|
| 208988_at   | 103 |    | 32 | 0.00131 | 2.51 | FBXL11  |
| 206592_s_at | 104 |    | 33 | 0.00045 | 2.51 | AP3D1   |
| 215299_x_at | 105 |    | 34 | 0.00051 | 2.51 | SULT1A1 |
| 215157_x_at | 106 | 72 |    | 0.00063 | 2.51 | PABPC3  |
| 212387_at   | 107 |    | 35 | 0.00208 | 2.51 | TCF4    |
| 205909_at   | 108 | 73 |    | 0.00144 | 2.51 | POLE2   |
| 205412_at   | 109 | 74 |    | 0.00166 | 2.51 | ACAT1   |
| 219547_at   | 110 | 75 |    | 0.00117 | 2.51 | COX15   |
| 202589_at   | 111 | 76 |    | 0.00264 | 2.51 | TYMS    |
| 200853_at   | 112 | 77 |    | 0.00183 | 2.51 | H2AFZ   |
| 218421_at   | 113 |    | 36 | 0.00166 | 2.51 | CERK    |
| 204868_at   | 114 | 78 |    | 0.00204 | 2.51 | ICT1    |
| 204616_at   | 115 | 79 |    | 0.00177 | 2.51 | UCHL3   |

Rank 1 = ranks of probe sets with expression values being high in Early Relapse Group

Rank 2 = ranks of probe sets with expression values being high in Late Relapse Group

P values are those of F-test

## B: Early vs late relapse: Linear regression

54 Precursor B-ALL Cases, 118 probe sets are selected with FDR  $\leq 0.015$ 

| AffyID      | Overall Rank | Rank 1 | Rank 2 | p-value  | HOC P    | FDR (%) | Gene Symbol |
|-------------|--------------|--------|--------|----------|----------|---------|-------------|
| 201030_x_at | 1            | 1      |        | 1.00E-07 | 0.000864 | 0.0864  | LDHB        |
| 213564_x_at | 2            | 2      |        | 2.00E-07 | 0.002208 | 0.1104  | LDHB        |
| 208787_at   | 3            | 3      |        | 1.60E-06 | 0.015358 | 0.5121  | MRPL3       |
| 201013_s_at | 4            | 4      |        | 3.70E-06 | 0.035033 | 0.5335  | PAICS       |
| 202934_at   | 5            | 5      |        | 3.70E-06 | 0.035121 | 0.5335  | HK2         |
| 201014_s_at | 6            | 6      |        | 3.70E-06 | 0.035121 | 0.5335  | PAICS       |
| 35666_at    | 7            |        | 1      | 3.90E-06 | 0.037325 | 0.5335  | SEMA3F      |
| 212359_s_at | 8            |        | 2      | 4.70E-06 | 0.045476 | 0.5689  | KIAA0913    |
| 211995_x_at | 9            | 7      |        | 0.000006 | 0.057174 | 0.5761  | ACTG1       |
| 217942_at   | 10           | 8      |        | 6.40E-06 | 0.061773 | 0.5761  | MRPS35      |
| 200903_s_at | 11           | 9      |        | 6.60E-06 | 0.063588 | 0.5761  | AHCY        |
| 211755_s_at | 12           | 10     |        | 8.10E-06 | 0.077775 | 0.5761  | ATP5F1      |
| 202276_at   | 13           | 11     |        | 8.30E-06 | 0.080068 | 0.5761  | SHFM1       |
| 201268_at   | 14           | 12     |        | 8.40E-06 | 0.080539 | 0.5761  | NME2        |
| 204616_at   | 15           | 13     |        | 9.50E-06 | 0.090981 | 0.5905  | UCHL3       |
| 212694_s_at | 16           | 14     |        | 9.80E-06 | 0.094326 | 0.5905  | PCCB        |
| 219006_at   | 17           | 15     |        | 0.000012 | 0.115403 | 0.664   | C6orf66     |
| 200786_at   | 18           | 16     |        | 1.31E-05 | 0.125742 | 0.664   | PSMB7       |
| 202143_s_at | 19           | 17     |        | 1.31E-05 | 0.125921 | 0.664   | COPS8       |
| 91682_at    | 20           |        | 3      | 1.65E-05 | 0.15772  | 0.7902  | EXOSC4      |
| 212363_x_at | 21           | 18     |        | 0.000018 | 0.172745 | 0.8052  | ACTG1       |
| 208758_at   | 22           | 19     |        | 1.85E-05 | 0.176751 | 0.8052  | ATIC        |
| 201231_s_at | 23           | 20     |        | 2.03E-05 | 0.194262 | 0.8275  | ENO1        |
| 217884_at   | 24           | 21     |        | 2.21E-05 | 0.211195 | 0.8275  | FLJ10774    |
| 210052_s_at | 25           | 22     |        | 2.23E-05 | 0.213854 | 0.8275  | TPX2        |
| 207783_x_at | 26           |        | 4      | 2.24E-05 | 0.214598 | 0.8275  | TPT1        |
| 210346_s_at | 27           |        | 5      | 2.59E-05 | 0.247897 | 0.8548  | CLK1        |
| 203517_at   | 28           | 23     |        | 2.68E-05 | 0.257062 | 0.8548  | MTX2        |
| 221773_at   | 29           |        | 6      | 0.000027 | 0.258567 | 0.8548  | ELK3        |
| 207857_at   | 30           |        | 7      | 2.77E-05 | 0.265144 | 0.8548  | LILRA2      |
| 200650_s_at | 31           | 24     |        | 2.85E-05 | 0.272486 | 0.8548  | LDHA        |
| 204120_s_at | 32           | 25     |        | 2.86E-05 | 0.273319 | 0.8548  | ADK         |
| 200708_at   | 33           | 26     |        | 3.14E-05 | 0.300084 | 0.8548  | GOT2        |
| 201326_at   | 34           | 27     |        | 3.17E-05 | 0.30321  | 0.8548  | CCT6A       |
| 211970_x_at | 35           | 28     |        | 3.18E-05 | 0.304231 | 0.8548  | ACTG1       |
| 212020_s_at | 36           | 29     |        | 3.21E-05 | 0.30659  | 0.8548  | MKI67       |
| 216559_x_at | 37           | 30     |        | 3.55E-05 | 0.339844 | 0.9136  | LOC144983   |
| 205024_s_at | 38           | 31     |        | 3.67E-05 | 0.350999 | 0.9136  | RAD51       |
| 221978_at   | 39           |        | 8      | 3.71E-05 | 0.354883 | 0.9136  | HLA-F       |
| 212488_at   | 40           |        | 9      | 3.95E-05 | 0.377603 | 0.925   | COL5A1      |
| 201216_at   | 41           | 32     |        | 4.14E-05 | 0.395921 | 0.925   | C12orf8     |
| 200763_s_at | 42           | 33     |        | 4.25E-05 | 0.405918 | 0.925   | RPLP1       |
| 203095_at   | 43           | 34     |        | 0.000043 | 0.411419 | 0.925   | MTIF2       |
| 203325_s_at | 44           |        | 10     | 4.33E-05 | 0.413479 | 0.925   | COL5A1      |
| 200955_at   | 45           | 35     |        | 4.37E-05 | 0.417737 | 0.925   | IMMT        |
| 208985_s_at | 46           | 36     |        | 4.43E-05 | 0.423522 | 0.925   | EIF3S1      |
| 200966_x_at | 47           | 37     |        | 4.68E-05 | 0.44727  | 0.9493  | ALDOA       |
| 200705_s_at | 48           | 38     |        | 4.75E-05 | 0.454293 | 0.9493  | EEF1B2      |
| 201563_at   | 49           | 39     |        | 4.84E-05 | 0.462843 | 0.9493  | SORD        |

|             |     |    |    |          |          |        |           |
|-------------|-----|----|----|----------|----------|--------|-----------|
| 200957_s_at | 50  | 40 |    | 5.57E-05 | 0.53176  | 1.069  | SSRP1     |
| 204444_at   | 51  | 41 |    | 6.18E-05 | 0.58987  | 1.1164 | KIF11     |
| 200883_at   | 52  | 42 |    | 6.33E-05 | 0.604993 | 1.1164 | UQCRC2    |
| 208002_s_at | 53  | 43 |    | 6.46E-05 | 0.616961 | 1.1164 | BACH      |
| 205027_s_at | 54  |    | 11 | 6.59E-05 | 0.628736 | 1.1164 | MAP3K8    |
| 201322_at   | 55  | 44 |    | 0.000066 | 0.629625 | 1.1164 | ATP5B     |
| 204119_s_at | 56  | 45 |    | 6.67E-05 | 0.637005 | 1.1164 | ADK       |
| 201550_x_at | 57  | 46 |    | 0.000067 | 0.639324 | 1.1164 | ACTG1     |
| 200806_s_at | 58  | 47 |    | 6.81E-05 | 0.649469 | 1.1164 | HSPD1     |
| 201947_s_at | 59  | 48 |    | 6.93E-05 | 0.661235 | 1.1164 | CCT2      |
| 201931_at   | 60  | 49 |    | 7.14E-05 | 0.681203 | 1.1164 | ETFA      |
| 202441_at   | 61  | 50 |    | 7.22E-05 | 0.688765 | 1.1164 | C10orf69  |
| 216274_s_at | 62  | 51 |    | 7.29E-05 | 0.695466 | 1.1164 | SPC18     |
| 202416_at   | 63  | 52 |    | 7.33E-05 | 0.698923 | 1.1164 | DNAJC7    |
| 217946_s_at | 64  | 53 |    | 7.44E-05 | 0.709818 | 1.1164 | SAE1      |
| 204446_s_at | 65  |    | 12 | 7.87E-05 | 0.750467 | 1.1531 | ALOX5     |
| 222146_s_at | 66  |    | 13 | 7.93E-05 | 0.755919 | 1.1531 | TCF4      |
| 40225_at    | 67  |    | 14 | 0.000082 | 0.781489 | 1.1705 | GAK       |
| 209900_s_at | 68  | 54 |    | 8.29E-05 | 0.790369 | 1.1705 | SLC16A1   |
| 208910_s_at | 69  | 55 |    | 0.000085 | 0.810305 | 1.1827 | C1QBP     |
| 201614_s_at | 70  | 56 |    | 8.92E-05 | 0.85035  | 1.2027 | RUVBL1    |
| 204868_at   | 71  | 57 |    | 8.95E-05 | 0.853025 | 1.2027 | ICT1      |
| 208676_s_at | 72  | 58 |    | 9.02E-05 | 0.859511 | 1.2027 | PA2G4     |
| 218557_at   | 73  | 59 |    | 9.17E-05 | 0.874095 | 1.2064 | NIT2      |
| 217768_at   | 74  | 60 |    | 9.57E-05 | 0.91183  | 1.2361 | C14orf166 |
| 203664_s_at | 75  | 61 |    | 9.79E-05 | 0.932217 | 1.2361 | POLR2D    |
| 202954_at   | 76  | 62 |    | 9.91E-05 | 0.944217 | 1.2361 | UBE2C     |
| 218663_at   | 77  | 63 |    | 9.92E-05 | 0.94469  | 1.2361 | HCAP-G    |
| 219553_at   | 78  | 64 |    | 0.000103 | 0.983544 | 1.2361 | NME7      |
| 211626_x_at | 79  |    | 15 | 0.000103 | 0.984012 | 1.2361 | ERG       |
| 202591_s_at | 80  | 65 |    | 0.000104 | 0.989431 | 1.2361 | SSBP1     |
| 203211_s_at | 81  | 66 |    | 0.000105 | 0.996754 | 1.2361 | MTMR2     |
| 211971_s_at | 82  | 67 |    | 0.000107 | 0.999655 | 1.2361 | LRPPRC    |
| 200006_at   | 83  | 68 |    | 0.000109 | 0.999655 | 1.2361 | PARK7     |
| 217848_s_at | 84  | 69 |    | 0.00011  | 0.999655 | 1.2361 | PP        |
| 210338_s_at | 85  | 70 |    | 0.00011  | 0.999655 | 1.2361 | HSPA8     |
| 208619_at   | 86  | 71 |    | 0.000111 | 0.999655 | 1.2361 | DDB1      |
| 200079_s_at | 87  | 72 |    | 0.000116 | 0.999655 | 1.2829 | KARS      |
| 209568_s_at | 88  |    | 16 | 0.000118 | 0.999655 | 1.2876 | RGL1      |
| 212145_at   | 89  | 73 |    | 0.00012  | 0.999655 | 1.2897 | MRPS27    |
| 218788_s_at | 90  | 74 |    | 0.000123 | 0.999655 | 1.3119 | SMYD3     |
| 218568_at   | 91  | 75 |    | 0.000128 | 0.999655 | 1.3476 | FLJ10842  |
| 202613_at   | 92  | 76 |    | 0.000129 | 0.999655 | 1.3476 | CTPS      |
| 208696_at   | 93  | 77 |    | 0.000131 | 0.999655 | 1.3528 | CCT5      |
| 204168_at   | 94  | 78 |    | 0.000138 | 0.999655 | 1.4066 | MGST2     |
| 205550_s_at | 95  | 79 |    | 0.000139 | 0.999655 | 1.4066 | BRE       |
| 205412_at   | 96  | 80 |    | 0.000141 | 0.999655 | 1.408  | ACAT1     |
| 201036_s_at | 97  | 81 |    | 0.000143 | 0.999655 | 1.4132 | HADHSC    |
| 210650_s_at | 98  |    | 17 | 0.000148 | 0.999655 | 1.4175 | PCLO      |
| 210250_x_at | 99  | 82 |    | 0.000149 | 0.999655 | 1.4175 | ADSL      |
| 212600_s_at | 100 | 83 |    | 0.000152 | 0.999655 | 1.4175 | UQCRC2    |
| 212544_at   | 101 | 84 |    | 0.000152 | 0.999655 | 1.4175 | TRIP3     |
| 219797_at   | 102 |    | 18 | 0.000152 | 0.999655 | 1.4175 | MGAT4A    |

|             |     |    |    |          |          |        |          |
|-------------|-----|----|----|----------|----------|--------|----------|
| 212946_at   | 103 | 85 |    | 0.000152 | 0.999655 | 1.4175 | KIAA0564 |
| 207574_s_at | 104 |    | 19 | 0.00016  | 0.999655 | 1.4677 | GADD45B  |
| 200992_at   | 105 | 86 |    | 0.000161 | 0.999655 | 1.4677 | IPO7     |
| 201946_s_at | 106 | 87 |    | 0.000162 | 0.999655 | 1.4677 | CCT2     |
| 221691_x_at | 107 | 88 |    | 0.000165 | 0.999655 | 1.4758 | NPM1     |
| 213738_s_at | 108 | 89 |    | 0.000167 | 0.999655 | 1.4758 | ATP5A1   |
| 211710_x_at | 109 | 90 |    | 0.000168 | 0.999655 | 1.4758 | RPL4     |
| 209971_x_at | 110 | 91 |    | 0.00017  | 0.999655 | 1.4758 | JTV1     |
| 209642_at   | 111 | 92 |    | 0.000172 | 0.999655 | 1.4758 | BUB1     |
| 215143_at   | 112 | 93 |    | 0.000173 | 0.999655 | 1.4758 | FLJ36166 |
| 217907_at   | 113 | 94 |    | 0.000174 | 0.999655 | 1.4758 | MRPL18   |
| 214329_x_at | 114 |    | 20 | 0.000178 | 0.999655 | 1.4984 | TNFSF10  |
| 34406_at    | 115 |    | 21 | 0.000181 | 0.999655 | 1.4984 | KIAA0602 |
| 208752_x_at | 116 | 95 |    | 0.000182 | 0.999655 | 1.4984 | NAP1L1   |
| 212489_at   | 117 |    | 22 | 0.000184 | 0.999655 | 1.4984 | COL5A1   |
| 202231_at   | 118 | 96 |    | 0.000184 | 0.999655 | 1.4984 | GA17     |

Rank 1 = ranks of probe sets with expression values being high in Early Relapse Group

Rank 2 = ranks of probe sets with expression values being high in Late Relapse Group
