# Supplementary material
Source: PubMed Central journal article supplement (PMC1895482)
Supplement: blood_blood-2006-02-002824_6.pdf [file blood_blood-2006-02-002824_6.pdf]

A: Binary Classification, all patients (N=60)  
 115 probesets, FDR  $\leq 0.0041$

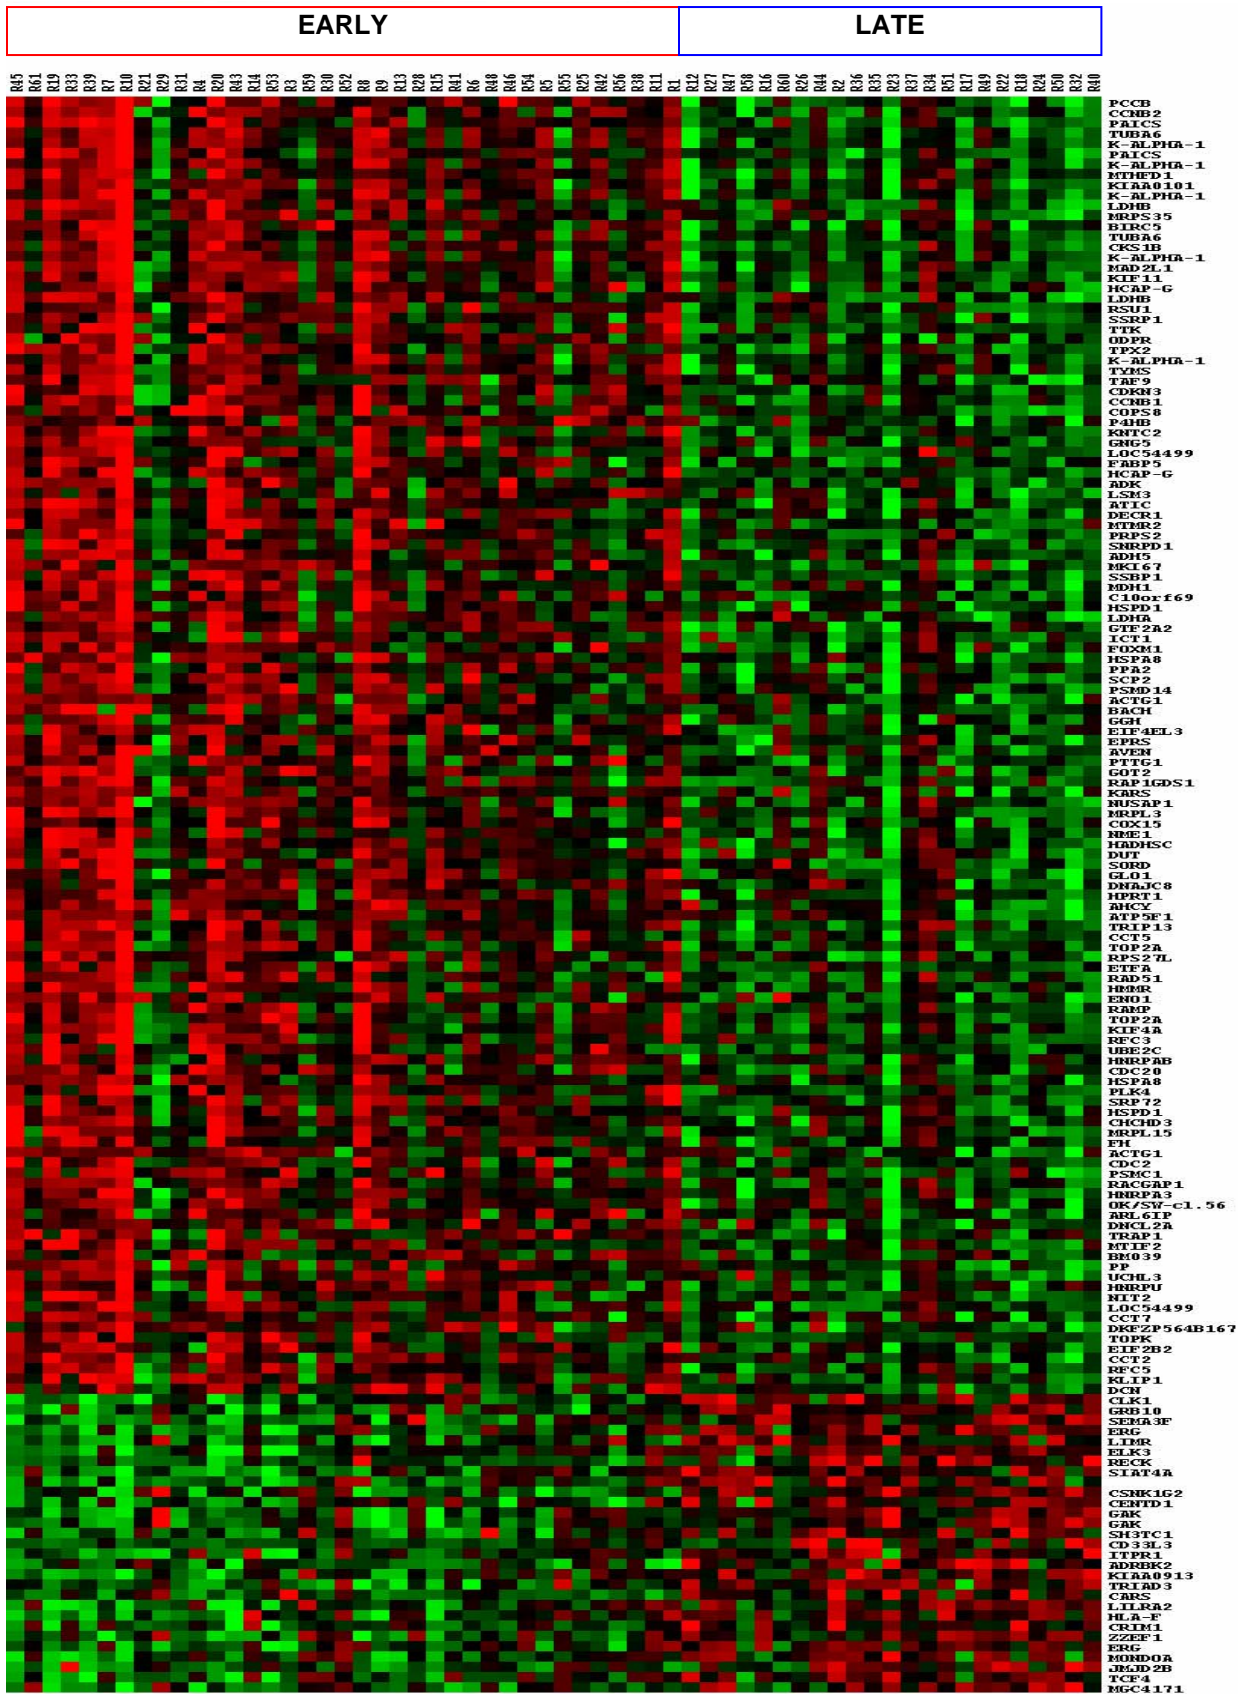

Relative Gene Expression  
 < 0.0 >

B: Linear Regression, all patients (N=60)

114 probe sets, FDR  $\leq 0.002$

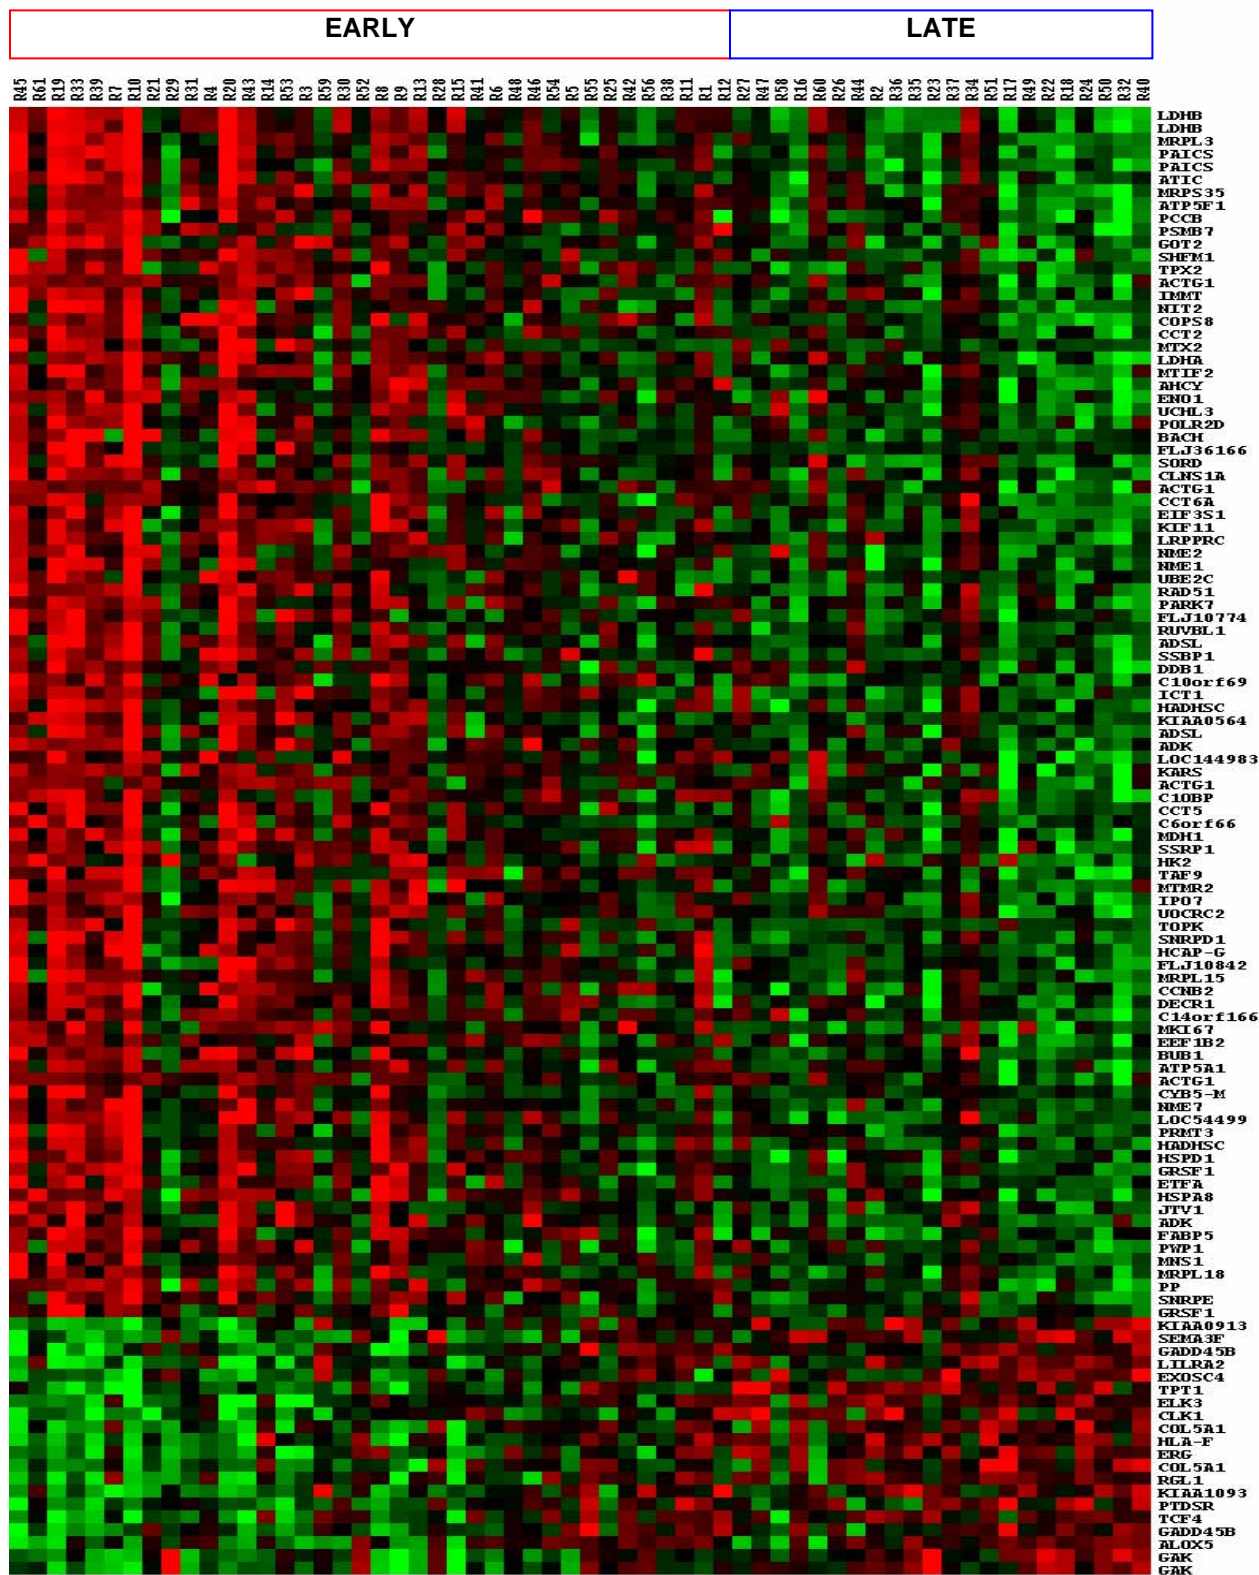

Relative Gene Expression

< 0.0 >
